# Supplementary material for: Reduced-Dose Rivaroxaban Is Associated with Lower All-Cause Mortality in Older Patients with Nonvalvular Atrial Fibrillation
Source: MDPI journal article supplement (doi:10.3390/jcm12206686), 2023-10-23
Supplement: s1 [file s1]

**Table S1.** Baseline characteristics in the patients with nonvalvular atrial fibrillation stratified by age.

|                                             | <b>Age &lt; 85 years</b> |       | <b>Age ≥ 85 years</b> |       | <b>P</b> |
|---------------------------------------------|--------------------------|-------|-----------------------|-------|----------|
| Numbers                                     | N=1793                   |       | N=593                 |       |          |
| Male Gender                                 | 799                      | 44.6% | 350                   | 59%   | <0.001   |
| <b>Atrial fibrillation type</b>             |                          |       |                       |       |          |
| Paroxysmal                                  | 857                      | 47.8% | 282                   | 47.6% | <0.001   |
| Persistent                                  | 368                      | 20.5% | 79                    | 13.3% |          |
| Permanent                                   | 288                      | 16.1% | 124                   | 20.9% |          |
| History of hospitalized heart failure       | 650                      | 36.3% | 274                   | 46.2% | <0.001   |
| Hypertension                                | 1390                     | 77.5% | 461                   | 77.7% | 0.902    |
| Uncontrolled hypertension                   | 113                      | 6.3%  | 55                    | 9.3%  | 0.016    |
| Diabetes mellitus                           | 661                      | 36.9% | 170                   | 28.7% | <0.001   |
| History of major bleeding complications     | 140                      | 7.8%  | 55                    | 9.3%  | 0.262    |
| History of INR > 3                          | 99                       | 5.5%  | 32                    | 5.4%  | 1.000    |
| History of systematic thromboembolic events | 514                      | 28.7% | 200                   | 33.7% | 0.023    |
| Any stroke                                  | 486                      | 27.1% | 195                   | 32.9% | 0.007    |
| History of ischemic stroke                  | 455                      | 25.4% | 185                   | 31.2% | 0.006    |
| History of hemorrhagic stroke               | 45                       | 2.5%  | 14                    | 2.4%  | 1.000    |
| CKD stage IIIb, IV, V                       | 275                      | 15.3% | 153                   | 25.8% | <0.001   |
| <b>Medication use</b>                       |                          |       |                       |       |          |
| Use of antiarrhythmic agents                | 619                      | 34.5% | 157                   | 26.5% | <0.001   |
| <b>Types of antiarrhythmic agents</b>       |                          |       |                       |       |          |
| Dronedarone                                 | 185                      | 10.3% | 65                    | 11.0% | <0.001   |
| Propafenone                                 | 165                      | 9.2%  | 25                    | 4.2%  |          |
| Amiodaron                                   | 238                      | 13.3% | 63                    | 10.6  |          |
| Sotalol                                     | 31                       | 1.7%  | 4                     | 0.7%  |          |
| Beta-blockers                               | 667                      | 37.2% | 162                   | 27.3% | <0.001   |
| Statin                                      | 645                      | 36.0% | 149                   | 25.1% | <0.001   |
| Aspirin                                     | 93                       | 5.2%  | 12                    | 2.0%  | 0.001    |
| P2Y12 inhibitor                             | 69                       | 3.8%  | 14                    | 2.4%  | 0.152    |
| Ticlopidine                                 | 6                        | 0.3%  | 4                     | 0.7%  | 0.277    |
| Cilostazol                                  | 25                       | 1.4%  | 16                    | 2.7%  | 0.044    |
| Antiplatelet or NSAID                       | 254                      | 14.2% | 73                    | 12.3% | 0.271    |

**Table S2.** Baseline characteristics in patients with nonvalvular atrial fibrillation stratified by rivaroxaban dose.

|                                         | <b>Reduced dose</b> |       | <b>Full dose</b> |       | <b>P</b> |
|-----------------------------------------|---------------------|-------|------------------|-------|----------|
| Numbers                                 | N=1208              |       | N=1178           |       |          |
| Male Gender                             | 626                 | 51.8% | 523              | 44.4% | <0.001   |
| <b>Atrial fibrillation type</b>         |                     |       |                  |       |          |
| Paroxysmal                              | 585                 | 48.4% | 554              | 47.0% | <0.001   |
| Persistent                              | 126                 | 10.4% | 321              | 27.2% |          |
| Permanent                               | 116                 | 9.6%  | 296              | 25.1% |          |
| History of hospitalized heart failure   | 444                 | 36.8% | 480              | 40.7% | 0.048    |
| Hypertension                            | 963                 | 79.7% | 888              | 75.4% | 0.039    |
| Uncontrolled hypertension               | 93                  | 7.7%  | 75               | 6.4%  | 0.23     |
| Diabetes mellitus                       | 391                 | 32.4% | 440              | 37.4% | 0.011    |
| History of major bleeding complications | 47                  | 3.9%  | 148              | 12.6% | <0.001   |
| History of INR > 3                      | 16                  | 1.3%  | 115              | 9.8%  | <0.001   |

|                                             |     |       |     |       |        |
|---------------------------------------------|-----|-------|-----|-------|--------|
| History of systematic thromboembolic events | 327 | 27.1% | 387 | 32.9% | 0.002  |
| Any stroke                                  | 311 | 25.7% | 370 | 31.4% | 0.002  |
| History of ischemic stroke                  | 284 | 23.5% | 356 | 30.2% | <0.001 |
| History of hemorrhagic stroke               | 32  | 2.6%  | 27  | 2.3%  | 0.6    |
| CKD stage IIIb, IV, V                       | 289 | 23.9% | 139 | 11.9% | <0.001 |
| Medication                                  |     |       |     |       |        |
| Use of antiarrhythmic agents                | 441 | 36.5% | 335 | 28.4% | <0.001 |
| Types of antiarrhythmic agents              |     |       |     |       |        |
| Dronedarone                                 | 189 | 15.6% | 61  | 5.2%  | <0.001 |
| Propafenone                                 | 71  | 5.9%  | 119 | 10.1% |        |
| Amiodaron                                   | 158 | 13.1% | 143 | 12.1% |        |
| Sotalol                                     | 23  | 1.9%  | 12  | 1.0%  |        |
| Beta-blockers                               | 396 | 32.9% | 431 | 36.6% | 0.084  |
| Statin                                      | 388 | 32.1% | 406 | 34.5% | 0.241  |
| Aspirin                                     | 57  | 4.7%  | 48  | 4.1%  | 0.485  |
| P2Y12 inhibitor                             | 52  | 4.3%  | 31  | 2.6%  | 0.04   |
| Ticlopidine                                 | 4   | 0.3%  | 8   | 0.5%  | 0.543  |
| Cilostazol                                  | 24  | 2.0%  | 17  | 1.4%  | 0.346  |
| Antiplatelet or NSAID                       | 109 | 9.0%  | 218 | 18.5% | <0.001 |
